# Supplementary material for: A TIMS-TOF mass spectrometry study of disaccharides from in situ ESI derivatization with 3-pyridinylboronate
Source: Royal Society of Chemistry journal article supplement (doi:10.1039/d0an01677b), 2020-11-05
Supplement: d0an01677b1.pdf [file d0an01677b1.pdf]

## Electronic Supporting Information

### **A TIMS-TOF mass spectrometry study of either the positive or the negative ions of disaccharides from in-situ derivatization ESI with 3-pyridinylboronate**

Lei Li<sup>a,b</sup>, Jiancheng Yu<sup>a,c</sup>, Chengyi Xie<sup>a,c</sup>, Chenlu Wang<sup>a,b</sup>, Pengfei Guan<sup>a,b</sup>, Jun Jack Hu<sup>a,b,\*</sup> and Keqi Tang<sup>a,b,\*</sup>

<sup>a</sup> Zhejiang Provincial Key Laboratory of Advanced Mass Spectrometry and Molecular Analysis, Institute of Mass Spectrometry, Ningbo University, Ningbo 315211, P. R. China

<sup>b</sup> School of Material Science and Chemical Engineering, Ningbo University, Ningbo 315211, P. R. China

<sup>c</sup> Faculty of Electrical Engineering and Computer Science, Ningbo University, Ningbo 315211, P. R. China

\*Corresponding author: junhu1@nbu.edu.cn; keqitang@nbu.edu.cn

**Figure S1.** Mobilograms of the sodium ion adducts of 9 disaccharides

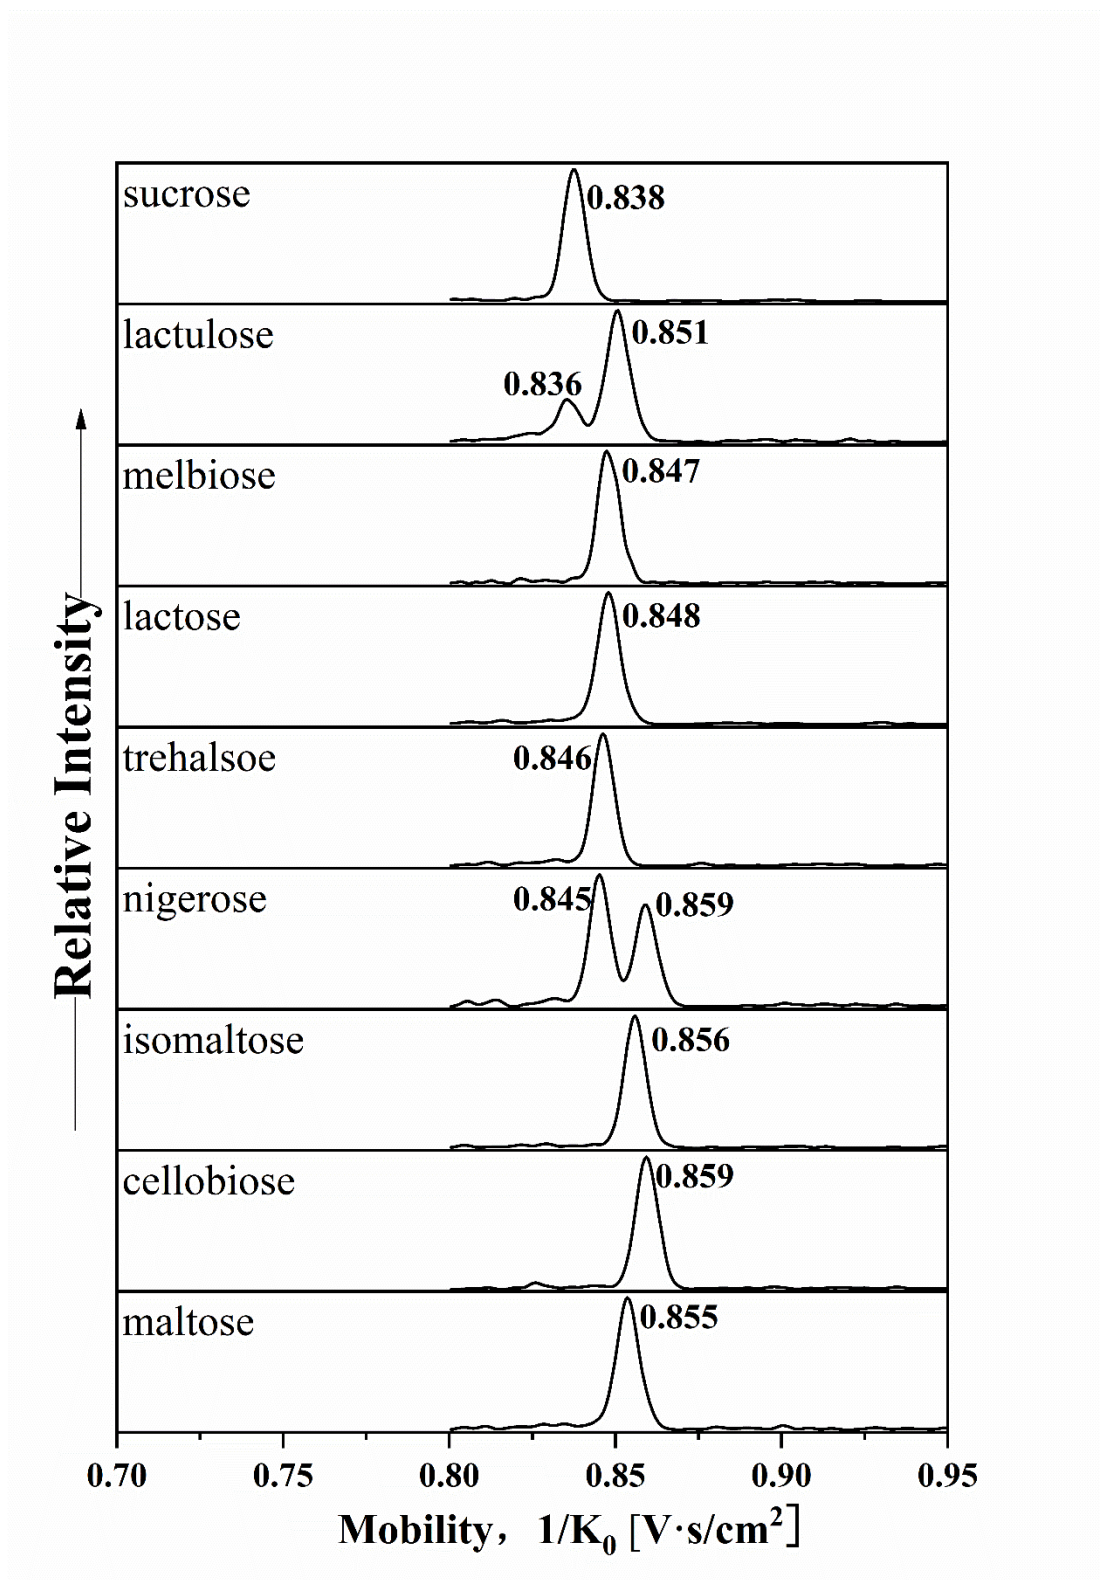

**Figure S2.** Mobilograms of the PBA double-tagged ions of 9 disaccharides ( $m/z$  517) in cation mode

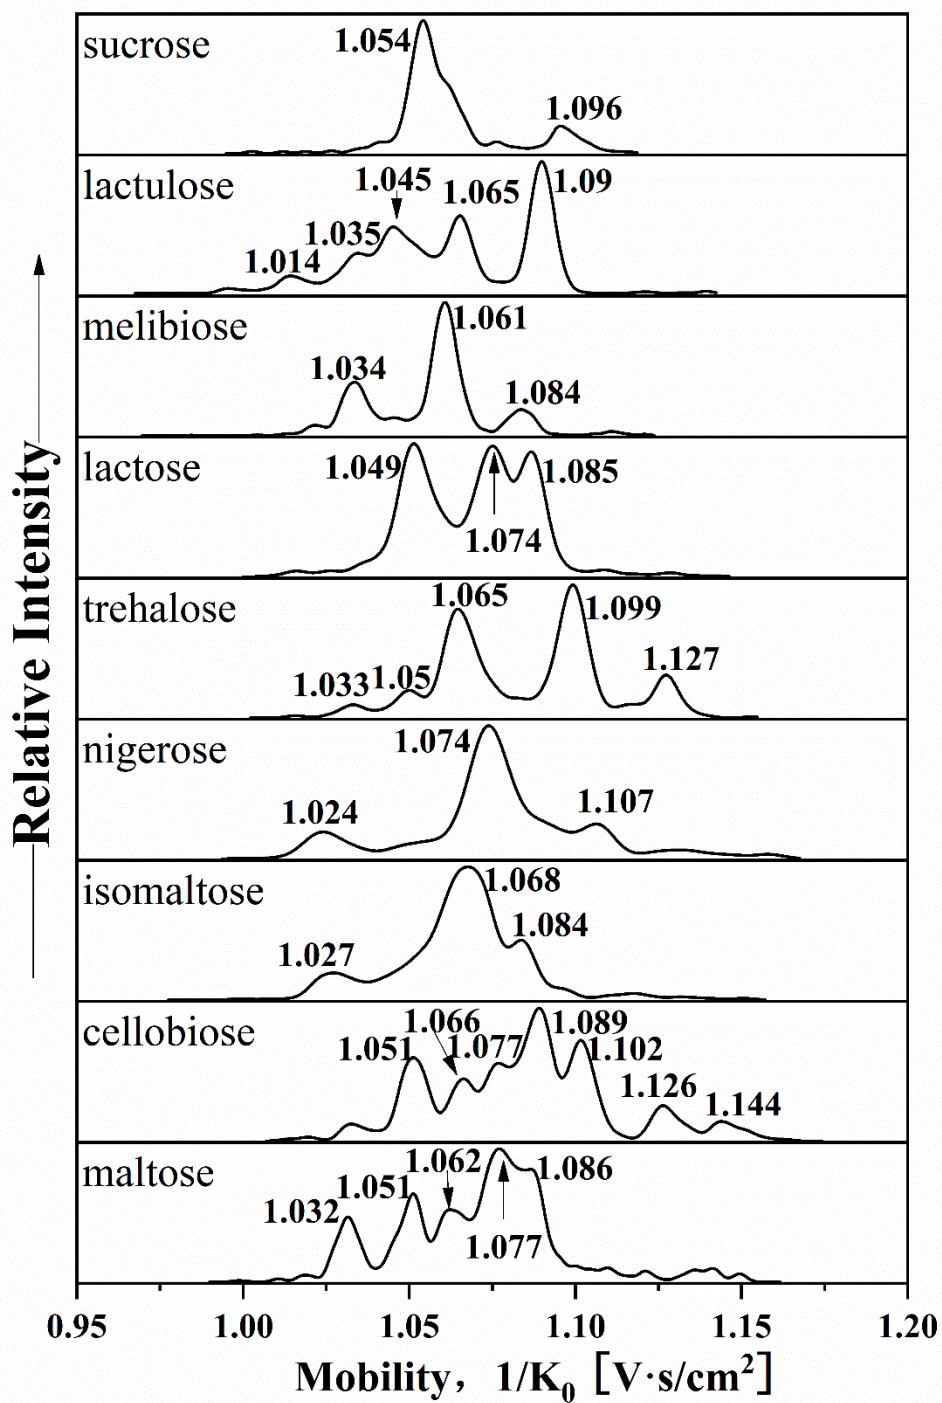

**Figure S3.** Mobilograms of the PBA double-tagged ions of 9 disaccharides ( $m/z$  535) in cation mode

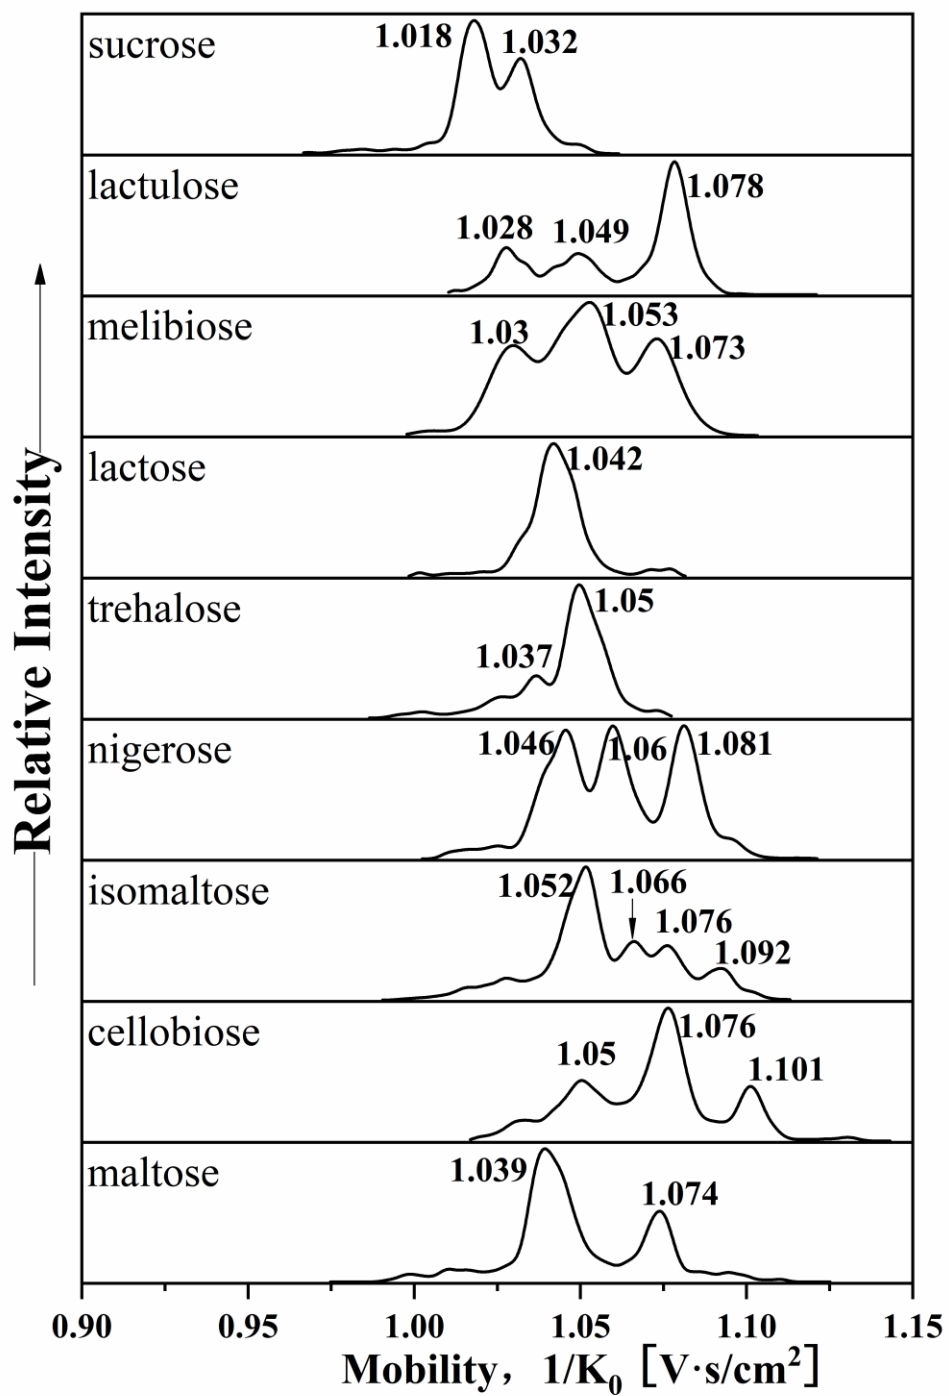



**Figure S4.** Mobilograms of the PBA double-tagged ions of 9 disaccharides ( $m/z$  515) in anion mode





**Table S1.** CCS values of sodium ion adducts in this report in comparison with that in the literature

|                              | CCS (literature <sup>1</sup> ) [ $\text{\AA}^2$ ] | CCS (this work) [ $\text{\AA}^2$ ] | CCS differences (%) |
|------------------------------|---------------------------------------------------|------------------------------------|---------------------|
| [Sucrose+Na] <sup>+</sup>    | 173.9                                             | 174.0                              | 0.057               |
| [Lactose+Na] <sup>+</sup>    | 178.8                                             | 176.2                              | 1.45                |
| [Maltose+Na] <sup>+</sup>    | 179.2                                             | 177.6                              | 0.89                |
| [Melibiose+Na] <sup>+</sup>  | 181.1                                             | 176.2                              | 2.71                |
| [Cellobiose+Na] <sup>+</sup> | 178.7                                             | 178.6                              | 0.056               |
| [Isomaltose+Na] <sup>+</sup> | 178.0                                             | 177.8                              | 0.11                |
| [Lactulose+Na] <sup>+</sup>  | 180.1                                             | 176.8                              | 1.83                |
| [Trehalose+Na] <sup>+</sup>  | 177.8                                             | 175.9                              | 1.07                |
| [Nigerose+Na] <sup>+</sup>   | —                                                 | 175.6                              | —                   |

**Table S2.** The CCS values of the sodium ion adducts and those of the PBA tagged ions of the 9 disaccharides in cation mode (all the experiments were performed using N<sub>2</sub> as buffer gas in trapped ion mobility, major peaks were in bold)

|            | CCS [Å <sup>2</sup> ] |                                          |                                           |                                           |
|------------|-----------------------|------------------------------------------|-------------------------------------------|-------------------------------------------|
|            | [M+Na] <sup>+</sup>   | [M+PBA-2H <sub>2</sub> O+H] <sup>+</sup> | [M+2PBA-4H <sub>2</sub> O+H] <sup>+</sup> | [M+2PBA-3H <sub>2</sub> O+H] <sup>+</sup> |
| Sucrose    | 174.0                 | <b>203.2</b>                             | <b>204.1</b> /209.4                       | <b>209.1</b> /212                         |
| Lactose    | 176.2                 | <b>188.1</b> /194.3                      | 204.4/ <b>208.9</b> /214.5                | <b>214</b>                                |
| Maltose    | 177.6                 | <b>204.8</b>                             | <b>204.4</b> /209.2/211.8                 | <b>213.5</b> /220.6                       |
| Melibiose  | 176.2                 | 188.3/ <b>207.2</b>                      | 204.4/ <b>209.7</b> /213/223.1            | 211.6/ <b>216.3</b> /220.4                |
| Cellobiose | 178.6                 | <b>206.4</b>                             | <b>215.1</b> /221                         | 215.8/ <b>221.1</b> /226.2                |
| Isomaltose | 177.8                 | <b>206.4</b>                             | 206.5/210.2/ <b>212.5</b> /217.9          | <b>216</b>                                |
| Lactulose  | 176.8                 | <b>190.1</b> /192.2                      | 204.1/ <b>207.8</b> /212.3                | 211.1/215.6/ <b>221.5</b>                 |
| Trehalose  | 175.9                 | 197.5/ <b>206.8</b>                      | <b>206.8</b> /214.1                       | <b>215.6</b>                              |
| Nigerose   | 175.6                 | <b>190.6</b> / <b>206.6</b>              | <b>212.4</b>                              | 214.8/ <b>217.7</b> / <b>222.1</b>        |



**Table S3.** The CCS values of the sodium ion adducts and those of the PBA tagged ions of the 9 disaccharides in anion mode (all the experiments were performed using N<sub>2</sub> as buffer gas in trapped ion mobility, major peaks were in bold)

|            | CCS [Å <sup>2</sup> ]                    |                                           |
|------------|------------------------------------------|-------------------------------------------|
|            | [M+PBA-2H <sub>2</sub> O-H] <sup>-</sup> | [M+2PBA-4H <sub>2</sub> O-H] <sup>-</sup> |
| Sucrose    | <b>190</b> /193/195.4/198.6/202.5        | <b>216.8</b> /225.3                       |
| Lactose    | 188.4/ <b>192.7</b> /197.1               | <b>216</b> /221.1/223.3                   |
| Maltose    | 190.3/ <b>192.9</b>                      | 212.1/215.8/218.6/ <b>221.5</b>           |
| Melibiose  | 185.2/ <b>191.5</b>                      | 212.6/ <b>218.5</b>                       |
| Cellobiose | <b>192.9</b> /196.9                      | 216.2/219.3/221.4/ <b>223.9</b> /226.5    |
| Isomaltose | 185.8/ <b>192</b>                        | <b>219.6</b> /222.8                       |
| Lactulose  | 188.4/192.8/ <b>196.8</b>                | 215.1/219.1/ <b>224.1</b>                 |
| Trehalose  | 191.4/194.6/ <b>197.9</b> /204.3         | 218.9/ <b>226</b> /231.6                  |
| Nigerose   | 187.2/192.5/ <b>199.3</b>                | <b>221</b>                                |

**Table S4.** Magnifications of the IMS  $R_{p-p}$  values of the main peaks for PBA tagged disaccharides in comparison with those of the sodium ion adducts

| Disaccharide Pair     | Magnification |         |                 |         |         |
|-----------------------|---------------|---------|-----------------|---------|---------|
|                       | m/z 430       | m/z 517 | m/z 535         | m/z 428 | m/z 515 |
| sucrose-lactose       | 7.15          | 2.34    | 2.19            | 1.06    | 0.40    |
| sucrose-maltose       | 0.42          | 0.06    | 0.81            | 0.61    | 0.92    |
| sucrose-melibiose     | 1.80          | 2.00    | 1.65            | 0.70    | 0.59    |
| sucrose-cellobiose    | 0.68          | 2.02    | 1.84            | 0.56    | 1.07    |
| sucrose-isomaltose    | 0.84          | 1.92    | 1.26            | 0.52    | 0.42    |
| sucrose-lactulose     | 4.09          | 1.24    | 3.54            | 2.55    | 2.35    |
| sucrose-trehalose     | 2.00          | 1.51    | 2.76            | 4.73    | 4.47    |
| sucrose-nigerose      | 8.27          | 4.84    | 2.39/3.86/6.90  | 5.18    | 1.92    |
| lactose-maltose       | 9.69          | 2.88    | 0.02            | 0.16    | 1.92    |
| lactose-melibiose     | 82.03         | 2.84    | 0.46            | 3.51    | 9.05    |
| lactose-cellobiose    | 6.64          | 2.07    | 1.70            | 0.11    | 1.98    |
| lactose-isomaltose    | 9.38          | 1.74    | 0.67            | 0.15    | 0.77    |
| lactose-lactulose     | 2.14          | 1.21    | 6.14            | 3.86    | 7.31    |
| lactose-trehalose     | 81.78         | 10.00   | 5.07            | 19.04   | 36.16   |
| lactose-nigerose      | 5.53          | 7.27    | 1.06/5.13/12.87 | 9.93    | 6.53    |
| maltose-melibiose     | 1.73          | 3.27    | 1.00            | 0.78    | 1.90    |
| maltose-cellobiose    | 1.69          | 10.55   | 5.34            | —       | 1.62    |
| maltose-isomaltose    | 3.47          | 16.47   | 3.67            | 1.20    | 2.00    |
| maltose-lactulose     | 18.95         | 5.05    | 8.32            | 4.05    | 2.91    |
| maltose-trehalose     | 1.05          | 1.41    | 0.81            | 1.90    | 1.75    |
| maltose-nigerose      | 6.53          | 3.30    | 0.37/1.16/2.70  | 1.73    | 0.16    |
| melibiose-cellobiose  | 0.33          | 1.61    | 0.93            | 0.49    | 1.80    |
| melibiose-isomaltose  | 0.47          | 1.25    | 0.06            | 0.33    | 0.51    |
| melibiose-lactulose   | 22.67         | 2.19    | 4.00            | 7.67    | 9.00    |
| melibiose-trehalose   | 0.86          | 5.36    | 0.68            | 13.71   | 16.79   |
| melibiose-nigerose    | 25.19         | 3.05    | 0.95/1.00/4.48  | 9.24    | 3.14    |
| cellobiose-isomaltose | —             | 3.05    | 4.91            | 0.95    | 3.23    |
| cellobiose-lactulose  | 8.29          | 3.47    | 0.17            | 1.80    | 0.08    |
| cellobiose-trehalose  | 0.14          | 2.60    | 1.28            | 1.41    | 0.49    |
| cellobiose-nigerose   | 5.17          | 0.71    | 1.18/0.68/0.25  | 1.42    | 0.59    |
| isomaltose-lactulose  | 14.76         | 3.84    | 3.59            | 3.84    | 2.41    |
| isomaltose-trehalose  | 0.18          | 2.51    | 0.13            | 2.37    | 1.66    |
| isomaltose-nigerose   | 6.98          | 0.07    | 0.30/0.42/1.83  | 2.21    | 0.26    |
| lactulose-trehalose   | 13.54         | 0.95    | 4.05            | 0.89    | 1.51    |
| lactulose-nigerose    | 0.30          | 3.09    | 3.30/2.00/0.41  | 1.45    | 1.86    |
| trehalose-nigerose    | 74.79         | 24.11   | 2.33/6.16/22.88 | 5.07    | 16.71   |

## References

1. Zheng, X.; Aly, N. A.; Zhou, Y.; Dupuis, K. T.; Bilbao, A.; Paurus, V. L.; Orton, D. J.; Wilson, R.; Payne, S. H.; Smith, R. D.; Baker, E. S. A structural examination and collision cross section database for over 500 metabolites and xenobiotics using drift tube ion mobility spectrometry. *Chem. Sci.* **2017**, *8* (11), 7724-7736.
